# Supplementary material for: Differential association between inflammatory cytokines and multiorgan dysfunction in COVID-19 patients with obesity
Source: PLOS journal article supplement (doi:10.1371/journal.pone.0252026), 2021-05-26
Supplement: S2 (10.1371/journal.pone.0252026.s002) [file journal.pone.0252026.s002]

**S2 Table : Respiratory distress of patients without COPD**

|                                            | [ALL] (N=47) | <=25 (N=14) | 25-30 (N=23) | >=30 (N=10) | p overall | p trend      |
|--------------------------------------------|--------------|-------------|--------------|-------------|-----------|--------------|
| <b>ICU required on admission</b>           |              |             |              |             | 0.492     | 0.212        |
| No                                         | 14 (29.8%)   | 6 (42.9%)   | 6 (26.1%)    | 2 (20.0%)   |           |              |
| yes                                        | 33 (70.2%)   | 8 (57.1%)   | 17 (73.9%)   | 8 (80.0%)   |           |              |
| <b>ICU required during hospitalization</b> |              |             |              |             | 0.131     | 0.072        |
| No                                         | 8 (17.0%)    | 5 (35.7%)   | 2 (8.70%)    | 1 (10.0%)   |           |              |
| yes                                        | 39 (83.0%)   | 9 (64.3%)   | 21 (91.3%)   | 9 (90.0%)   |           |              |
| <b>WHO scale<sup>#</sup></b>               |              |             |              |             | 0.137     | <b>0.033</b> |
| 4-5                                        | 17 (36.2%)   | 8 (57.1%)   | 7 (30.4%)    | 2 (20.0%)   |           |              |
| 6-7                                        | 11 (23.4%)   | 2 (14.3%)   | 8 (34.8%)    | 1 (10.0%)   |           |              |
| 8-9                                        | 19 (40.4%)   | 4 (28.6%)   | 8 (34.8%)    | 7 (70.0%)   |           |              |
| <b>Death</b>                               |              |             |              |             | 0.114     | 0.356        |
| No                                         | 35 (74.5%)   | 8 (57.1%)   | 20 (87.0%)   | 7 (70.0%)   |           |              |
| yes                                        | 12 (25.5%)   | 6 (42.9%)   | 3 (13.0%)    | 3 (30.0%)   |           |              |

**WHO scale<sup>#</sup>**

- Without oxygen therapy or oxygen by mask or nasal prongs (score 4-5)
- Oxygen by NIV or high flow or mechanical ventilation and pO2 /FIO2 >150 or spO2/FIO2>200 (score 6-7)
- Mechanical ventilation and pO2/FIO2<150 or spO2/FIO2<200 or vasopressors (score 8), and vasopressors or dialysis or ECMO (score 9)
